# Supplementary material for: Reconstruction of Metabolic–Protein Interaction Integrated Network of Eriocheir sinensis and Analysis of Ecdysone Synthesis
Source: MDPI journal article supplement (doi:10.3390/genes15040410), 2024-03-26
Supplement: s1 [file s1]

### Supplementary file 1 Construction of biomass equation

| substance                  | content | unit   | coefficient | compound ID |
|----------------------------|---------|--------|-------------|-------------|
| H2O                        | 54.2    | g/100g | 65.6889     | C00001      |
| Glucose                    | 0.777   | g/100g | 0.0942      | C00267      |
| Fructose                   | 0.268   | g/100g | 0.0325      | C02336      |
| ASP                        | 0.6786  | g/100g | 0.1113      | C00049      |
| THR                        | 0.3499  | g/100g | 0.0641      | C00188      |
| SER                        | 0.27775 | g/100g | 0.0577      | C00065      |
| GLU                        | 0.8508  | g/100g | 0.1263      | C00025      |
| GLY                        | 0.38925 | g/100g | 0.1132      | C00037      |
| ALA                        | 0.45235 | g/100g | 0.1109      | C00041      |
| VAL                        | 0.38635 | g/100g | 0.072       | C00183      |
| MET                        | 0.16695 | g/100g | 0.0244      | C00073      |
| ILE                        | 0.29345 | g/100g | 0.0488      | C00407      |
| LEU                        | 0.54125 | g/100g | 0.0901      | C00123      |
| TYR                        | 0.42925 | g/100g | 0.0517      | C00082      |
| PHE                        | 0.3457  | g/100g | 0.0457      | C00079      |
| LYS                        | 0.4455  | g/100g | 0.0665      | C00047      |
| HIS                        | 0.1846  | g/100g | 0.026       | C00135      |
| ARG                        | 0.44565 | g/100g | 0.0559      | C00062      |
| PRO                        | 0.30265 | g/100g | 0.0574      | C00148      |
| TRP                        | 0.08    | g/100g | 0.0085      | C00078      |
| CYS                        | 0.07    | g/100g | 0.012       | C00097      |
| ASN                        | 0.4745  | g/100g | 0.0784      | C00152      |
| GLN                        | 0.4745  | g/100g | 0.0709      | C00064      |
| Lauric acid                | 0.0427  | g/100g | 0.0047      | C02679      |
| Tridecylic acid            | 0.0221  | g/100g | 0.0023      | M00001      |
| Myristic acid              | 0.920   | g/100g | 0.088       | C06424      |
| Myristoleic acid           | 0.0990  | g/100g | 0.0095      | C08322      |
| Pentadecylic acid          | 0.261   | g/100g | 0.0235      | C16537      |
| Palmitic acid              | 7.55    | g/100g | 0.6429      | C00249      |
| Palmitoleic acid           | 3.45    | g/100g | 0.2961      | C08362      |
| Margaric acid              | 0.146   | g/100g | 0.0118      | M00002      |
| cis-10- Heptadecenoic acid | 0.217   | g/100g | 0.0177      | M00003      |
| Stearic acid               | 1.05    | g/100g | 0.0806      | C01530      |
| Elaidic acid               | 0.0654  | g/100g | 0.0051      | C01712      |
| Oleic acid                 | 7.87    | g/100g | 0.6083      | C00712      |
| Linoleic acid              | 4.40    | g/100g | 0.3426      | C01595      |
| Arachidic acid             | 0.119   | g/100g | 0.0083      | C06425      |
| $\gamma$ -Linolenic acid   | 0.0265  | g/100g | 0.0021      | C06426      |
| cis-11-Eicosenoic acid     | 0.686   | g/100g | 0.0482      | C16526      |
| $\alpha$ -Linolenic acid   | 0.502   | g/100g | 0.0394      | C06427      |
| HeneiCosanoic acid         | 0.0512  | g/100g | 0.0034      | M00004      |

|                                                     |        |         |         |        |
|-----------------------------------------------------|--------|---------|---------|--------|
| all cis-11,14<br>-Eicosadienoic acid                | 0.223  | g/100g  | 0.0158  | C16525 |
| Behenic acid                                        | 0.0581 | g/100g  | 0.0037  | C08281 |
| Dihomo- $\gamma$ -linolenic acid                    | 0.0421 | g/100g  | 0.003   | C03242 |
| Erucic acid                                         | 0.0818 | g/100g  | 0.0053  | C08316 |
| all cis-11,14,17-<br>Eicosatrienoic acid            | 0.107  | g/100g  | 0.0076  | C16522 |
| Arachidonic acid                                    | 0.412  | g/100g  | 0.0295  | C00219 |
| Tricosanoic acid                                    | 0.0376 | g/100g  | 0.0023  | M00005 |
| all cis-13,16-<br>Docosadienoic acid                | 0.0177 | g/100g  | 0.0011  | C16533 |
| Lignoceric acid                                     | 0.0523 | g/100g  | 0.0031  | C08320 |
| all<br>cis-5,8,11,14,17-Eicosapen<br>taenoic acid   | 1.36   | g/100g  | 0.0982  | C06428 |
| Nervonic acid<br>(Selacholeic)                      | 0.107  | g/100g  | 0.0064  | C08323 |
| all<br>cis-4,7,10,13,16,19-Docos<br>ahexaenoic acid | 3.37   | g/100g  | 0.224   | C06429 |
| P                                                   | 174    | mg/100g | 0.1227  | C06262 |
| Ca                                                  | 1.56   | g/kg    | 0.085   | C00076 |
| Cu                                                  | 10.5   | mg/kg   | 0.0004  | C00070 |
| Fe                                                  | 74.3   | mg/kg   | 0.0029  | C14819 |
| K                                                   | 1.46   | g/kg    | 0.0815  | C00238 |
| Mg                                                  | 307    | mg/kg   | 0.0276  | C00305 |
| Mn                                                  | 2.02   | mg/kg   | 0.0001  | C00034 |
| Na                                                  | 2.26   | g/kg    | 0.2146  | C01330 |
| Zn                                                  | 16.9   | mg/kg   | 0.0006  | C00038 |
| Se                                                  | 0.41   | mg/kg   | 0.00001 | C01529 |
| CMP                                                 | 0.33   | mg/100g | 0.00002 | C00055 |
| UMP                                                 | 0.96   | mg/100g | 0.00006 | C00105 |
| IMP                                                 | 2.02   | mg/100g | 0.00013 | C00130 |
| GMP                                                 | 0.5    | mg/100g | 0.00003 | C00144 |
| AMP                                                 | 0.5    | mg/100g | 0.00003 | C00020 |
| ATP                                                 |        |         | 29.8303 | C00002 |
| ADP                                                 |        |         | 29.8303 | C00008 |
| hydron                                              |        |         | 29.8303 | C00080 |
| phosphate                                           |        |         | 29.8303 | C00009 |

Biomass reaction: B00001

65.6889 C00001 + 0.0942 C00267 + 0.0325 C02336 + 0.1113 C00049 + 0.0641

C00188 + 0.0577 C00065 + 0.1263 C00025 + 0.1132 C00037 + 0.1109 C00041 +  
0.072 C00183 + 0.0244 C00073 + 0.0488 C00407 + 0.0901 C00123 + 0.0517 C00082  
+ 0.0457 C00079 + 0.0665 C00047 + 0.026 C00135 + 0.0559 C00062 + 0.0574  
C00148 + 0.0085 C00078 + 0.012 C00097 + 0.0784 C00152 + 0.0709 C00064 +  
0.0047 C02679 + 0.0023 M00001 + 0.088 C06424 + 0.0095 C08322 + 0.0235  
C16537 + 0.6429 C00249 + 0.2961 C08362 + 0.0118 M00002 + 0.0177 M00003 +  
0.0806 C01530 + 0.0051 C01712 + 0.6083 C00712 + 0.3426 C01595 + 0.0083  
C06425 + 0.0021 C06426 + 0.0482 C16526 + 0.0394 C06427 + 0.0034 M00004 +  
0.0158 C16525 + 0.0037 C08281 + 0.003 C03242 + 0.0053 C08316 + 0.0076 C16522  
+ 0.0295 C00219 + 0.0023 M00005 + 0.0011 C16533 + 0.0031 C08320 + 0.0982  
C06428 + 0.0064 C08323 + 0.224 C06429 + 0.1227 C06262 + 0.085 C00076 +  
0.0004 C00070 + 0.0029 C14819 + 0.0815 C00238 + 0.0276 C00305 + 0.0001  
C00034 + 0.2146 C01330 + 0.0006 C00038 + 0.00001 C01529 + 0.00002 C00055 +  
0.00006 C00105 + 0.00013 C00130 + 0.00003 C00144 + 0.00003 C00020 + 29.8303  
C00002 --> 29.8303 C00008 + 29.8303 C00009 + 29.8303 C00080 + Biomass
